# Supplementary material for: Nanozyme-based guanidinium peptides mediate surface reactive oxygen species for multidrug resistant bacterial infection management
Source: Royal Society of Chemistry journal article supplement (doi:10.1039/d3tb01104f), 2023-01-01
Supplement: d3tb01104f1.pdf [file d3tb01104f1.pdf]

## Supplementary Information

### Nanozyme-Based Guanidine polypeptide Mediate Surface Reactive Oxygen Species for Multidrug Resistance Bacterial Infections Management

Xufeng Zhu<sup>a,b,1</sup>, Qiang Sun<sup>a,b,c,1</sup>, Jinjun Chen<sup>a,b,c</sup>, Chunmei Liang<sup>a,b,c</sup>, Liang Chen<sup>a,b</sup>,

Yi Qi<sup>a,b</sup>, Hui Luo<sup>a,b</sup>, Lanmei Chen<sup>\*c</sup>, Jincan Chen<sup>\*a,b,c</sup>

<sup>a</sup>The Marine Biomedical Research Institute, Guangdong Medical University,

Zhanjiang, Guangdong, 524023, China

<sup>b</sup>The Marine Biomedical Research Institute of Guangdong Zhanjiang, Zhanjiang,

Guangdong, 524023, China

<sup>c</sup>Guangdong Key Laboratory for Research and Development of Natural Drugs, School of Pharmacy, Guangdong Medical University, Zhanjiang, Guangdong, 524023, China

\*Corresponding author: E-mail address: lanmeichen@126.com (Lanmei Chen);

[jincanchen@126.com](mailto:jincanchen@126.com) (Jincan Chen).

<sup>1</sup> Both authors contributed equally to this work.

## **Experimental section:**

### **1. Materials**

All the reagents were used as received without further purification. Iridium trichloride was obtained from Chemical Technology (Shandong) Co., Ltd. Sipunculus nudus Linnaeus Peptides (SNLP) was purchased from ChinaPeptides Co., Ltd. BS-12 was purchased from Maya Reagent. Vancomycin, 1-(3-Dimethylaminopropyl)-3-ethylcarbodiimide hydrochloride (EDC HCl), N-hydroxysulfosuccinimide (Sulfo-NHS), 2-(N-morpholino) ethanesulfonic acid (MES), 3, 3', 5, 5'-tetramethylbenzidine (TMB) and terephthalic acid were purchased from Aladdin (China). Luria-Bertani (LB), Luria Bertani agar were acquired from guangdong huankai microbial scl&tech Co., Ltd. Sodium hydroxide (NaOH), phosphate-buffered saline (PBS), MTT, DCFH-DA were obtained from Sigma-Aldrich (St.Louis, MO, USA). LIVE/DEAD viability/cytotoxicity kits for mammalian cells were purchased from Beijing Solarbio Science &Technology Co., Ltd. Standard strains of Methicillin-resistant Staphylococcus aureus ATCC 33591 (MRSA) and Escherichia coli ATCC 8739 (*E. coli*) were obtained from the Chongqing Boer Biotech. NIH/3T3 and HUVEC cells were obtained from National Biomedical Experimental Cell Repository. ICR mice were obtained from SPF (Beijing) Biotechnology Co., Ltd.

### **2. Fabrication of IrO<sub>x</sub> NPs, SNLP/BS-12@IrO<sub>x</sub> NPs (SBI NPs) and other reagents**

#### **2.1 Fabrication of IrO<sub>x</sub> NPs**

Iridium trichloride (IrCl<sub>3</sub> · xH<sub>2</sub>O, 0.15 g) were dissolved in 50 mL doubly distilled water and the solution of IrCl<sub>3</sub> was filtered by 0.22 μm syringe filter. After that, NaOH solution (1.0 M) was added and adjust the pH to 12.0 and the mixture was allowed to be further stirred at room temperature for ~2.5 h. Then, the mixture was allowed to react for 6 h at 80 °C under vigorous stirring. Finally, the product was collected and further washed by water for three times through being centrifuged at 10000 rpm for 10 min and collected freeze-drying.<sup>1</sup>

## 2.2 Synthesis of SNLP/BS-12

BS-12 (100 mg) was activated with EDC HCl and sulfo-NHS in MES buffer solution (0.1 M, pH= 6.0). The molar ratio of BS-12: EDC HCl: sulfo-NHS was 1:4:4. After activation for 12 h, the mixture was added to 130  $\mu$ L of SNLP solution (10 mg mL<sup>-1</sup>) in PBS (0.1 M, pH = 7.4) for 24 h. The molar ratio of SNLP: BS-12 was 1:1. At the end of the reaction, the solution was dialyzed (MWCO 500) overnight and collected freeze-drying.

## 2.3 Fabrication of SBI NPs

Different volumes (0.2 mL, 1 mL, 3 mL) of SNLP/BS-12 aqueous solution (15 mg mL<sup>-1</sup>) was dropwise added to 5 mL of IrCl<sub>3</sub>  $\cdot$  xH<sub>2</sub>O (3 mg mL<sup>-1</sup>) aqueous solution and adjust the pH to 12.0. The mixture was allowed to be stirred for another 6 h at 80  $^{\circ}$ C. The product was collected and washed by water for three times through being centrifuged at 10000 rpm for 10 min and collected freeze-drying.

## 2.4 Preparation of Rho B-SBI NPs

Rho B is activated in the same way as SNLP. Afterwards, an equal mass of SBI NPs was added and the reaction continued for 12 h. More than 10 times washing with pure water were used to remove the excess Rho B.

## 3. Characterization

The prepared nanozymes were characterized by using various methods. TEM measurements were carried out on a TECNAI G2 equipped with EDS at 200 kV. The EDX mapping images and atomic structure images were characterized using a JEM ARM-200 (JEOL, Tokyo, Japan) transmission electron microscope operated at 200 kV. X-ray photoelectron spectroscopy (XPS) analysis was conducted by a Thermo-VG Scientific ESCALAB 250 spectrometer. Ultraviolet–visible (UV–vis) absorption spectra were recorded with a UV-2600 spectrophotometer (Shimadzu). The infrared spectra were collected with a Thermo Scientific Nicolet iS50 Fourier transform infrared (FT-IR) spectrometer.

## **4. Peroxidase (POD)-like activity assay**

### **4.1 POD activity at different pH values**

Firstly, SBI NPs (2  $\mu\text{L}$ , 10  $\text{mg mL}^{-1}$ ), TMB (4  $\mu\text{L}$ , 10  $\text{mM}$ ) and  $\text{H}_2\text{O}_2$  (2  $\mu\text{L}$ , 2.0  $\text{M}$ ) were added to a 96-well plate, followed by 192  $\mu\text{L}$  of HAc-NaAc buffers of different pHs (4.5, 5.5, 6.5 and 7.4). After 5 min of reaction, the absorption curves were scanned with a UV-vis spectrophotometer ( $n=3$ ). The background solution was HAc-NaAc buffers for SBI NPs.

### **4.2 POD activity at different temperatures**

SBI NPs (2  $\mu\text{L}$ , 10  $\text{mg mL}^{-1}$ ), TMB (4  $\mu\text{L}$ , 10  $\text{mM}$ ) and  $\text{H}_2\text{O}_2$  (2  $\mu\text{L}$ , 2.0  $\text{M}$ ) were added to a 96-well plate, followed by 192  $\mu\text{L}$  of pH 4.5 HAc-NaAc buffers. After 5 min of reaction at different temperatures, the absorption curves were scanned with a UV-vis spectrophotometer ( $n=3$ ). The background solution was HAc-NaAc buffers for SBI NPs.

### **4.3 Calculation of Michaelis-Burk constant ( $K_m$ )**

SBI NPs (2  $\mu\text{L}$ , 10  $\text{mg mL}^{-1}$ ), TMB (4  $\mu\text{L}$ , 10  $\text{mM}$ ) and  $\text{H}_2\text{O}_2$  (2  $\mu\text{L}$ , 2.0  $\text{M}$ , 1.0  $\text{M}$ , 0.5  $\text{M}$ , 0.25  $\text{M}$ , 0.125  $\text{M}$ , 0.063  $\text{M}$ , 0.031  $\text{M}$ , 0.016  $\text{M}$ , 0.008  $\text{M}$ ) were added to a 96-well plate, followed by 192  $\mu\text{L}$  of pH 4.5 HAc-NaAc buffers. After 5 min of reaction, the absorption curves were scanned with a UV-vis spectrophotometer ( $n=3$ ). The background solution was HAc-NaAc buffers for SBI NPs.

Different concentrations of TMB (4  $\mu\text{L}$ , 50  $\text{mM}$ , 25  $\text{mM}$ , 12.5  $\text{mM}$ , 6.25  $\text{mM}$ , 3.13  $\text{mM}$ , 1.56  $\text{mM}$ , 0.78  $\text{mM}$ , 0.39  $\text{mM}$ ) were operated as above.

The Michaelis-Burk constant was calculated by the Lineweaver-Burk Plot:

$$1/V = K_m/V_{\max}(1/[S] + 1/K_m)$$

$V$  represents the initial velocity,  $V_{\max}$  represents the maximal reaction velocity and  $[S]$  indicates substrate concentration.

### **4.4 TA method for the detection of hydroxyl radicals (OH)**

3 mL of pH 4.5 HAc-NaAc buffers containing TA, TA+ $\text{H}_2\text{O}_2$ , TA+ $\text{IrO}_x$  NPs, SBI NPs, TA+SBI NPs, TA+ $\text{H}_2\text{O}_2$ + $\text{IrO}_x$  NPs and TA+ $\text{H}_2\text{O}_2$ +SBI NPs, respectively. After

20 min of reaction, the emission curves were measured by fluorescence spectrophotometer from 350 to 550 nm at 315 nm excitation wavelength.

#### **4.5 Recoverability and stability of nanomaterials**

A total volume of 1 mL pH 4.5 HAc-NaAc buffers was added to a 1.5 mL Eppendorf Tubes with a final concentration of  $100 \mu\text{g mL}^{-1}$   $\text{IrO}_x$  NPs, 20 mM  $\text{H}_2\text{O}_2$  and 0.2 mM TMB. After 5 min of reaction, the absorption curve was scanned with a UV-vis spectrophotometer. The recovered nanomaterials were separated from the reaction mixture and washed three times with pure water. The recovered nanomaterial was mixed with the fresh reaction mixture and the absorption curve was measured using the same procedure. A total of 5 times were tested. SBI NPs were operated as above.

### **5. Antibacterial experiments**

#### **5.1 Bacteria cells culture**

The MRSA and *E. coli* were cultured in LB medium in an orbital shaker at 37 °C, 180 rpm and maintained by growing the cell on LB agar.

#### **5.2 Measurement of Minimum Inhibitory Concentration (MIC)**

Each strain was extracted from an exponentially growing LB medium and washed twice with 0.9% NaCl solution. Two-fold serial dilution gradients of LB medium (100  $\mu\text{L}$ ) containing different fractions were added to 96-well plates, followed by an equal volume of medium containing bacteria to a final concentration of  $5 \times 10^5$  CFU  $\text{mL}^{-1}$  and incubation at 37 °C for 24 h with a shaker speed of 180 rpm. Absorbance values at 600 nm (OD600) were measured and growth was observed. Treatment concentrations at which no microbial growth was observed were identified as MIC values.

#### **5.3 plate counting method**

200  $\mu\text{L}$  of LB medium containing different concentrations of  $\text{IrO}_x$  NPs ( $125 \mu\text{g mL}^{-1}$ ,  $62.5 \mu\text{g mL}^{-1}$ ,  $31.25 \mu\text{g mL}^{-1}$ ) and  $5 \times 10^5$  CFU  $\text{mL}^{-1}$  of bacteria ( $n=3$ ) were added to 96-well plates and OD600 were measured at 0 h, 6 h, 9 h, 10 h, 11 h and 12 h. After 12 h of incubation, the suspensions were diluted 1000 times and 50  $\mu\text{L}$  was applied to agar plates and incubated at 37 °C for 18 h and colonies were counted. SBI NPs were tested as above.

## 5.4 Fractional inhibitory concentration (FIC) measurement

The synergy between the SNLP and BS-12, IrO<sub>x</sub> NPs and SNLP/BS-12 was assessed by checkerboard assays. Briefly, the two components were mixed in a 96-well plate with serial two-dimensional dilutions. The wells of the plates were inoculated with MRSA and OD600 was measured 24 h later for assessing the growth of the bacteria. The synergy effects were evaluated by calculating the FIC index according to the formula below:

$$\text{FIC} = \frac{\text{MIC}_A^{\text{Comb}}}{\text{MIC}_A} + \frac{\text{MIC}_B^{\text{Comb}}}{\text{MIC}_B}$$

$\text{MIC}_A^{\text{Comb}}$  and  $\text{MIC}_B^{\text{Comb}}$  indicate the MICs of the two components in combination. The interactions between the two components are defined according to standard criteria of considering  $\text{FIC} \leq 0.5$  as synergistic,  $0.5 < \text{FIC} \leq 1$  as additive,  $1 < \text{FIC} \leq 4$  as indifference, and  $\text{FIC} > 4$  as antagonism.

## 5.5 Bacterial live/dead staining

After treatment  $1 \times 10^7$  CFU mL<sup>-1</sup> MRSA with different components (PBS, IrO<sub>x</sub> NPs, SNLP/BS-12, SBI NPs, vancomycin,  $1/2 \times \text{MIC}$ ) for 2 h, the bacteria were stained with SYTO9/PI for 30 minutes and then washed three times with PBS. Live (green fluorescent) and dead (red fluorescent) bacteria were observed using an inverted fluorescent microscope.

## 6. Anti MRSA biofilm in vitro

### 6.1 Biofilm formation inhibition test

Biofilm formation was determined by crystalline violet staining. MRSA ( $2 \times 10^7$  CFU mL<sup>-1</sup>, 250  $\mu$ L) was added to a 12-well plate, followed by equal volumes of different components (PBS, 62.5  $\mu$ g mL<sup>-1</sup> IrO<sub>x</sub> NPs, 31.25  $\mu$ g mL<sup>-1</sup> SNLP BS-12, 62.5  $\mu$ g mL<sup>-1</sup> SBI NPs, 1.25  $\mu$ g mL<sup>-1</sup> vancomycin) in LB medium. After mixing, incubating at 37  $^{\circ}$ C, discarding supernatant and suspended bacteria at 24 h intervals and re-dose. The culture medium was discarded after 48 h and 72 h, respectively, and washed three times with PBS. After the 12-well plates had dried, the biofilms were stained with crystalline violet (0.1%, 500  $\mu$ L) for 30 min. Excess crystalline violet dye was removed, washed several times with PBS until the washing solution was clarified.

Afterwards, acetic acid solution (33%, 500  $\mu\text{L}$ ) was added to dissolve the crystalline violet dye and the OD600 was measured. SBI NPs were tested as above.

## **6.2 3D microscopic imaging of biofilms**

Biofilms were formed in confocal dishes in a similar way as described above. MRSA biofilms were treated with different components ( $1 \times \text{MIC}$ ), stained with SYTO9 dye for 30 min, washed 3 times with PBS and the 3D images of the biofilms were observed with an inverted fluorescence microscope.

## **7. Detection of ROS content**

The amount of ROS in MRSA can be observed by a DCFH-DA probe, at an excitation wavelength of 488 nm, using an inverted fluorescence microscope. Briefly, different fractions ( $1 \times \text{MIC}$ ) were added to  $1 \times 10^7$  CFU  $\text{mL}^{-1}$  MRSA separately, incubated for 2 h, centrifuged at 8000 rpm for 2 min and the supernatant discarded. The MRSA was resuspended with 0.9% NaCl solution, adding DCFH-DA and incubating for 30 min. After washing 3 times, photograph and observe by inverted fluorescence microscopy.

## **8. SBI NPs and bacteria colocalization**

$125 \mu\text{g mL}^{-1}$  Rho B-SBI NPs were incubated with  $1 \times 10^8$  CFU  $\text{mL}^{-1}$  MRSA in saline for 2 h. After 3 washes, the fluorescence imaging was observed by inverted fluorescence microscopy.

## **9. Construction of an acute lung infection model**

All animal procedures were performed in accordance with the Guidelines for Care and Use of Laboratory Animals of Guangdong Medical University and approved by the Animal Ethics Committee of Guangdong Medical University (SYXK (粤) 2019-0213). The model of acute lung infection was constructed by intranasal drip MRSA. Briefly,  $150 \mu\text{L}$  of  $1 \times 10^8$  CFU  $\text{mL}^{-1}$  MRSA was administered intranasally to 6-8 weeks ICR mice. On the second day, tail vein administrations (PBS,  $3 \text{ mg kg}^{-1}$  SBI NPs and  $3 \text{ mg kg}^{-1}$  *vancomycin*) were performed in each group ( $n=5$ ). On the third day, mice were executed by cervical dislocation, body weighed and lungs were removed and photographed. The lung tissues were also embedded, sectioned, H&E stained, Masson stained and Sirius red stained to observe the alveolar structure.

## 10. Diabetic wound healing

ICR mice were given 150 mg kg<sup>-1</sup> streptozotocin (STZ) on an empty stomach, every other day, for a total of 4 injections. Mice with blood glucose values  $\geq 11.1$  mmol L<sup>-1</sup> were randomly divided into 3 groups (n=5) and each group was administered 50  $\mu$ L PBS, 1 mg mL<sup>-1</sup> SBI NPs and 1 mg mL<sup>-1</sup> *vancomycin*. Two doses were administered in wounds. The mice were weighed and photographed on alternate days, and after day 9, skin tissues were removed from the injured areas for H&E staining to observe morphology.

## 11. Biosafety evaluation

### 11.1 Cell viability

Mouse embryonic fibroblasts cells NIH/3T3 and human umbilical vein endothelial cells HUVEC were used to assay cell viability after SBI NPs treatment. Briefly, 100  $\mu$ L of culture medium containing  $5 \times 10^3$  cells was added to a 96-well plate. After overnight incubation, the old culture medium was removed and fresh cultures containing different concentrations of SBI NPs were added and incubated for 24 h. After removal of the culture medium, these cells were washed three times with PBS and incubated with 100  $\mu$ L of MTT (0.5 mg mL<sup>-1</sup>) for 4 h. After removal of the MTT solution, the resulting purple methanamine was dissolved in 100  $\mu$ L of DMSO for 10 min. Finally, the absorbance value at 490 nm was measured indicating cell viability.

### 11.2 Hemolysis assay

The hemolysis assay was performed using 4% mouse red blood cells (RBCs). Fresh RBCs were washed 3 times with PBS (3500 rpm, 5 min) and PBS solutions containing different concentrations of SBI NPs were added. After 4 h incubation, the supernatants were centrifuged and the absorbance value at 540 nm was used to determine the hemolysis rate. Triton X-100 (1% in PBS) which was able to lyse RBCs completely was used as a positive control, while PBS was used as a negative control. The hemolysis ratio of RBCs was calculated according to the following formula:

$$\text{Hemolysis ratio(\%)} = \frac{A_{\text{treat}} - A_{\text{PBS}}}{A_{\text{PC}} - A_{\text{NC}}} \times 100\%$$



where  $A_{treat}$ ,  $A_{NC}$ ,  $A_{PC}$  and  $A_{PBS}$  were denoted as the absorbance value after addition of SBI NPs, PBS, Triton X-100 and PBS alone, respectively.

### 11.3 Assessment of biosafety in vivo

Healthy ICR mice were injected with  $5 \text{ mg kg}^{-1}$  SBI NPs in the tail vein and 24 h later, the major organs (heart, liver, spleen, lung and kidney) were collected for H&E staining. The sections were observed under a microscope to assess biosafety in vivo.

#### Error Analysis

Statistical analysis was performed using Origin Pro 2018 and GraphPad Prism 8.0. All data are presented as mean  $\pm$  standard deviation (SD). Significant differences were considered \* $p < 0.05$ ; \*\* $p < 0.01$ ; \*\*\* $p < 0.001$ .

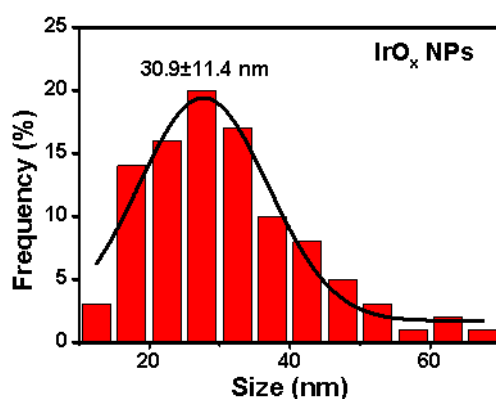

**Figure. S1** Particle size distributions of IrO<sub>x</sub> NPs.

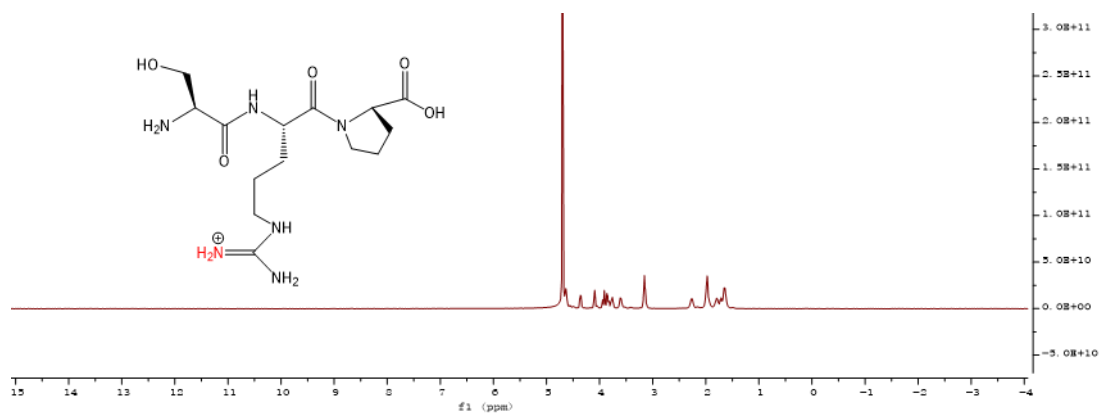

**Figure. S2**  $^1\text{H}$  NMR spectrum of SNLP (400 MHz,  $\text{D}_2\text{O}$ , 298 K).

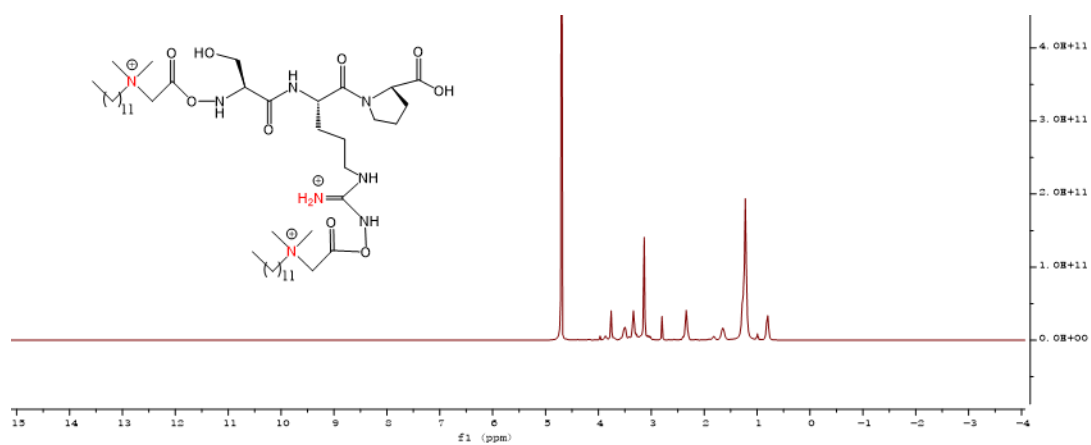

**Figure. S3**  $^1\text{H}$  NMR spectrum of SNLP/BS-12 (400 MHz,  $\text{D}_2\text{O}$ , 298 K).

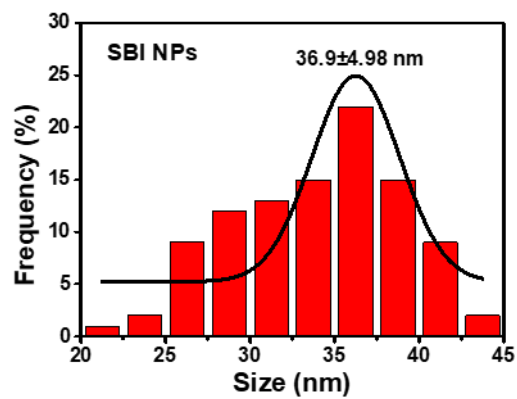

**Figure. S4** Particle size distributions of SBI NPs.

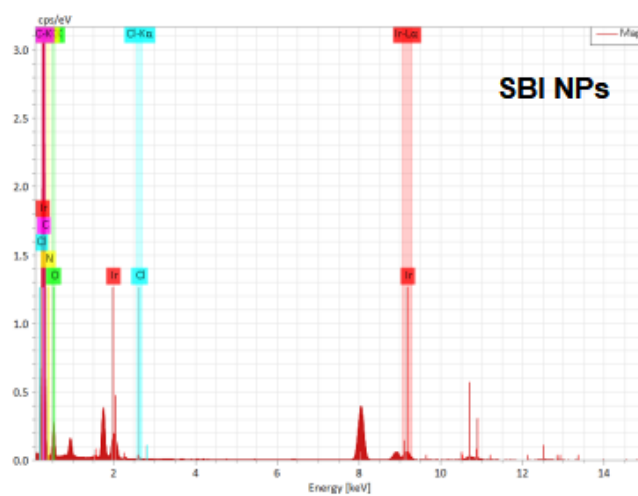

**Figure. S5** EDS spectrum of SBI NPs.

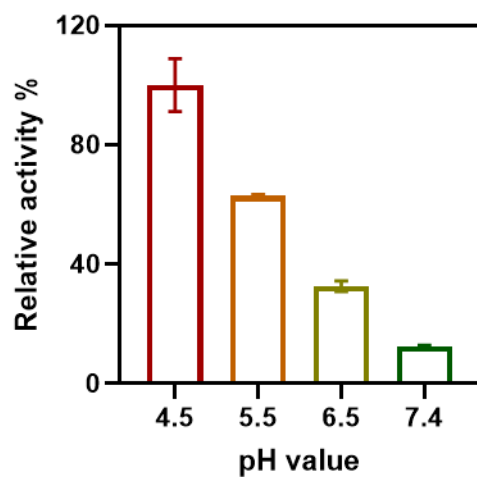

**Figure. S6** The catalytic ability of SBI NPs at different pH.

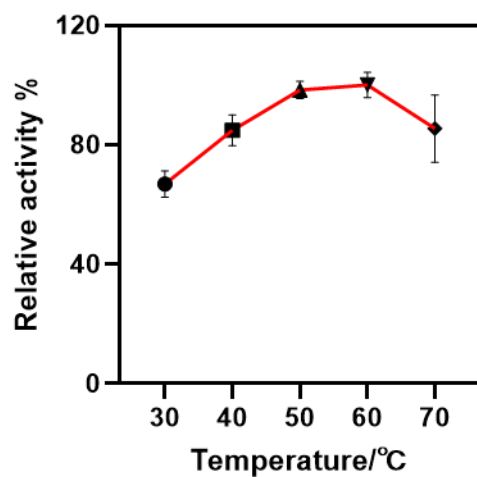

**Figure. S7** The catalytic ability of SBI NPs at different temperature.

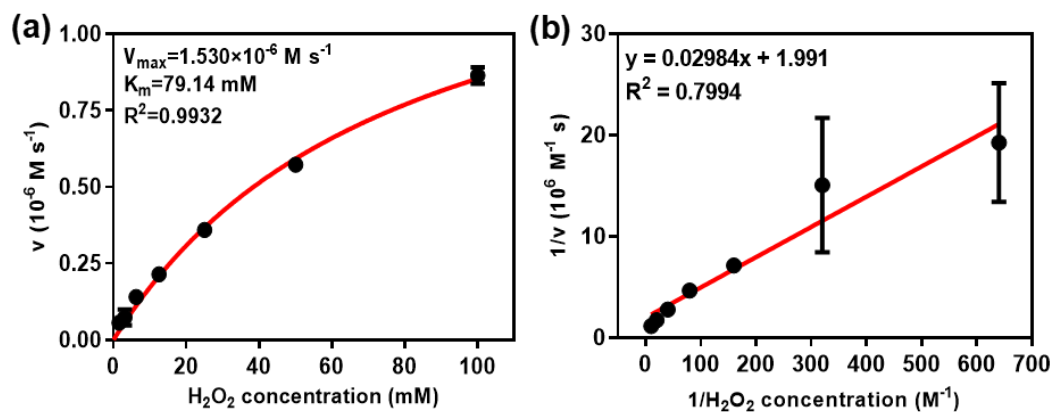

**Figure. S8** Kinetic determination of peroxidase activity of SBI NPs under different concentrations of  $\text{H}_2\text{O}_2$ .

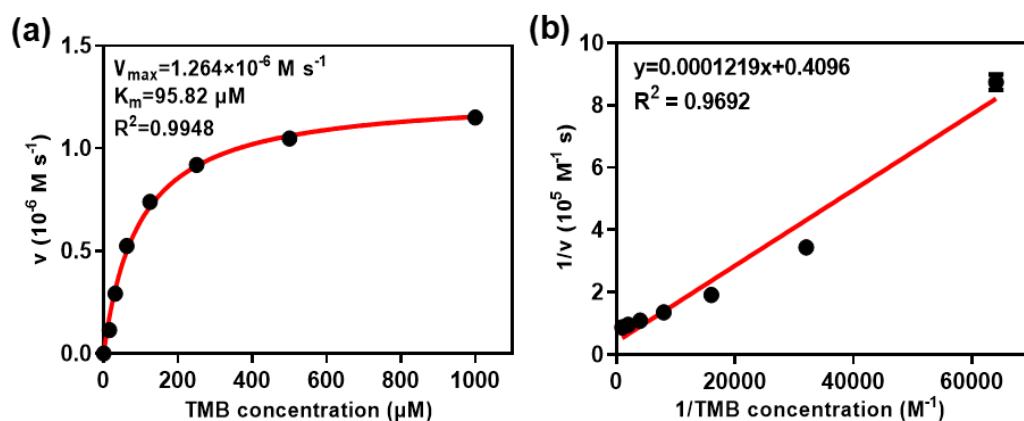

**Figure. S9** Kinetic determination of peroxidase activity of SBI NPs under different concentrations of TMB.

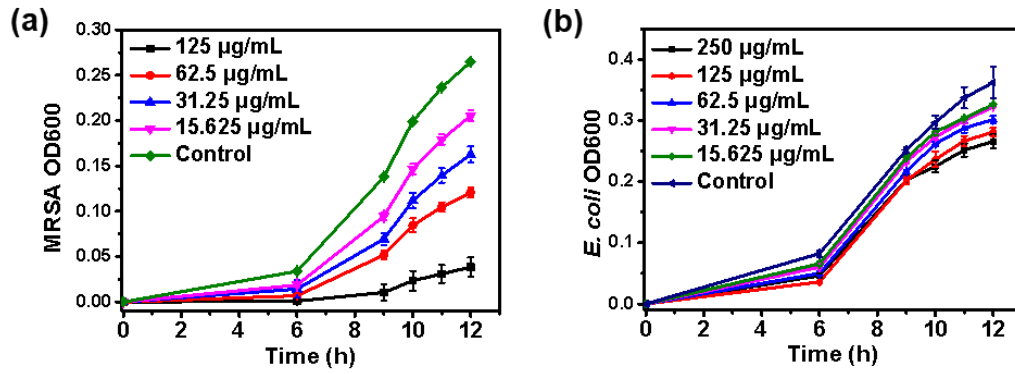

**Figure. S10** Growth curves of (a) MRSA and (b) *E. coli* exposed to different concentrations of IrO<sub>x</sub> NPs for 12 h.

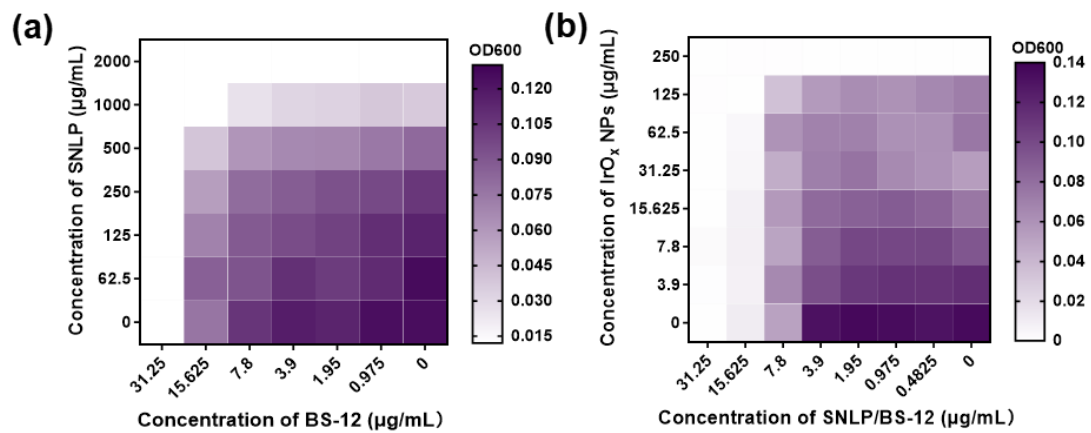

**Figure. S11** Checkerboard dilution assays performed on MRSA, which was used to evaluate the synergy between (a) SNLP and BS-12, (b) IrO<sub>x</sub> NPs and SNLP/BS-12.

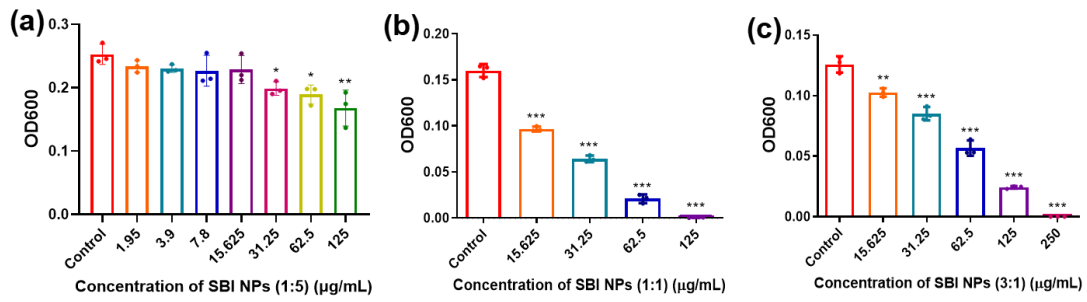

**Figure. S12** Different concentrations of (a) SBI NPs (1:5), (b) SBI NPs (1:1) and (c) SBI NPs (3:1) on MRSA for 24 h. \* $p < 0.05$ ; \*\* $p < 0.01$ ; \*\*\* $p < 0.001$  and n.s. no significant.

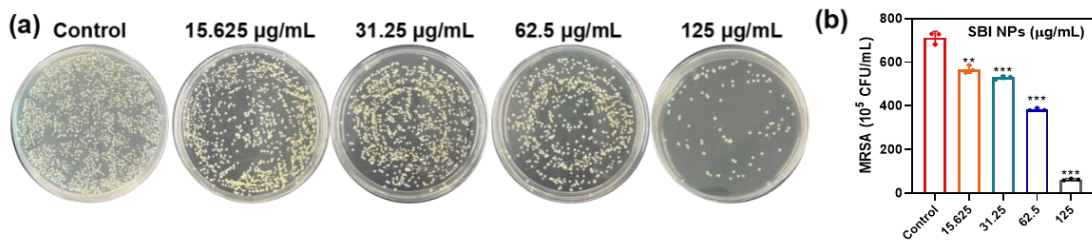

**Figure. S13** (a) The agar plate method to evaluate inhibition of bacterial growth by SBI NPs at different concentrations and (b) quantitative analysis. \* $p < 0.05$ ; \*\* $p < 0.01$ ; \*\*\* $p < 0.001$  and n.s. no significant.

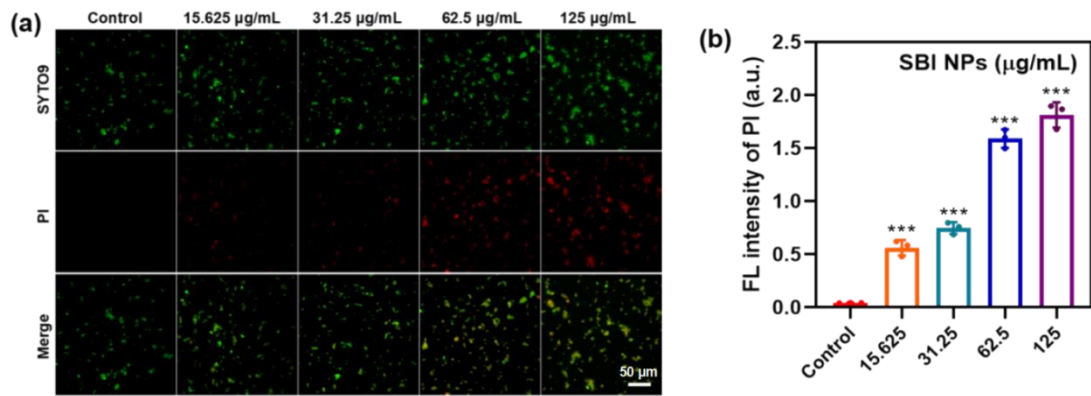

**Figure. S14** (a) Live/dead fluorescence staining images of MRSA treatment different concentrations of SBI NPs and (b) quantitative analysis. Scale bar: 50  $\mu\text{m}$ . \* $p < 0.05$ ; \*\* $p < 0.01$ ; \*\*\* $p < 0.001$  and n.s. no significant.

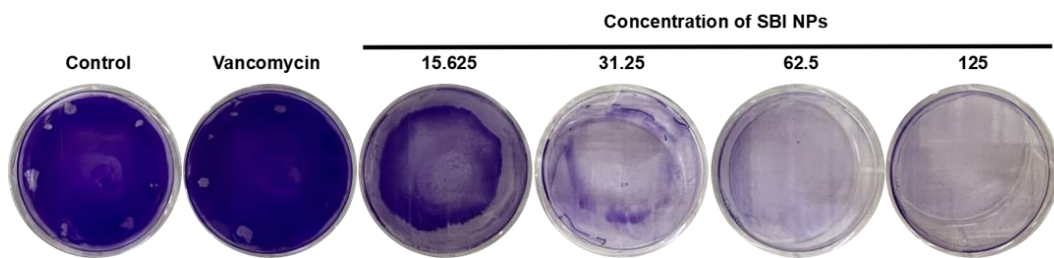

**Figure. S15** Macroscopic MRSA biofilm formation images incubation with *vancomycin* and different concentrations SBI NPs for 24 h.



**Table. S1** The Michaelis-Menton constant ( $K_m$ ) and maximum reaction rate ( $V_{max}$ ) of as prepared NPs with  $H_2O_2$  as the substrate for peroxidase-like catalysis.

| Catalysts                     | $K_m$ ( $10^{-3}$ M) | $V_{max}$ ( $10^{-8}$ M $s^{-1}$ ) | References |
|-------------------------------|----------------------|------------------------------------|------------|
| Horse radish peroxidase (HRP) | 3.70                 | 8.71                               | 2          |
| $Fe_3O_4$                     | 37.99                | 0.53                               | 3          |
| Ni-MOF snanosheets            | 2.49                 | 130                                | 4          |
| $Co_3O_4$ NPs                 | 5.9322               | 9.85                               | 5          |
| Au/ $CeO_2$ NPs               | 44.69                | 2.23                               | 6          |
| CuO                           | 400                  | 16.1                               | 7          |
| GO-COOH                       | 3.99                 | 3.85                               | 8          |
| $IrO_x$ NPs                   | 19.4                 | 179.6                              | This work  |
| SBI NPs                       | 79.14                | 153                                | This work  |

$K_m$ : Michaelis constant

$V_{max}$ : The maximal reaction velocity

**Table. S2** Minimum inhibitory concentration (MIC) of different components for MRSA ( $\mu\text{g mL}^{-1}$ ).

| SNLP | BS-12 | SNLP/BS-12 | IrO <sub>x</sub> NPs | SBI NPs (1:5) | SBI NPs (1:1) | SBI NPs (3:1) | Vancomycin |
|------|-------|------------|----------------------|---------------|---------------|---------------|------------|
| 2000 | 31.25 | 31.25      | > 125                | > 125         | 125           | 250           | 1.25       |

**Table. S3** Anti-bacterial activity of reported nanozymes.

| Nanozyme                         | Type     | Bacteria                                                                      | Concentration ( $\mu\text{g mL}^{-1}$ ) | References |
|----------------------------------|----------|-------------------------------------------------------------------------------|-----------------------------------------|------------|
| Au NCs                           | POD      | MRSA                                                                          | 20                                      | 9          |
| PtCu NPs                         | POD      | <i>S. aureus</i> , <i>E. coli</i>                                             | 258                                     | 10         |
| Au/C <sub>3</sub> N <sub>4</sub> | POD      | <i>S. aureus</i> , <i>E. coli</i>                                             | 20                                      | 11         |
| CuPt-GOx-CaP                     | POD, GOx | <i>S. aureus</i> , <i>E. coli</i>                                             | 200                                     | 12         |
| MnO <sub>x</sub> /HNCS           | OXD      | <i>S. aureus</i> , <i>P. aeruginosa</i>                                       | 100                                     | 13         |
| Pd@Ir octahedra                  | OXD      | <i>S. aureus</i> , <i>E. coli</i>                                             | 100                                     | 14         |
| PtCo@Graphene                    | OXD      | <i>H. pylori</i>                                                              | 70                                      | 15         |
| SPB NCPs                         | OXD      | <i>S. aureus</i> , <i>P. aeruginosa</i>                                       | 10                                      | 16         |
| AgPd <sub>0.38</sub>             | OXD      | <i>S. aureus</i> , <i>B. subtilis</i> , <i>E. coli</i> , <i>P. aeruginosa</i> | 16                                      | 17         |
| SBI NPs                          | POD      | MRSA                                                                          | 125                                     | This work  |

## References

- 1 W. Zhen, Y. Liu, W. Wang, M. Zhang, W. Hu, X. Jia, C. Wang and X. Jiang, *Angew Chem Int Ed Engl.* 2020, **59**, 9491-9497.
- 2 L. Gao, J. Zhuang, L. Nie, J. Zhang, Y. Zhang, N. Gu, T. Wang, J. Feng, D. Yang, S. Perrett and X. Yan, *Nature Nanotechnology.* 2007, **2**, 577-583.
- 3 K. Fan, H. Wang, J. Xi, Q. Liu, X. Meng, D. Duan, L. Gao, X. Yan, *Chem Commun (Camb).* 2016, **53**, 424-427.
- 4 Y. Zong, Z. Fan, F. Yang and H. Wang, *Molecular Catalysis.* 2021, **509**, 111609.
- 5 T. Gao, Y. Yin, G. Zhu, Q. Cao and W. Fang, *Catalysis Today.* 2020, **355**, 252-262.
- 6 X. Zhang, D. Duan, G. Li, W. Feng, S. Yang and Z. Sun, *Nanotechnology.* 2018, **29**, 095606.
- 7 Y. Duan, X. Liu, L. Han, S. Asahina, D. Xu, Y. Cao, Y. Yao and S. Che, *J Am Chem Soc.* 2014, **136**, 7193-6.
- 8 X. Shi, Y. Yu, Q. Yang and X. Hong, *Applied Surface Science.* 2020, **524**, 146397.
- 9 Y. Zheng, W. Liu, Z. Qin, Y. Chen, H. Jiang and X. Wang, *Bioconjug Chem.* 2018, **29**, 3094-3103.
- 10 X. Zhang, X. Jiang, T.R. Croley, M.D. Boudreau, W. He, J. Cai, P. Li and J. Yin, *Journal of Environmental Science and Health, Part C.* 2019, **37**, 99-115.
- 11 Z. Wang, K. Dong, Z. Liu, Y. Zhang, Z. Chen, H. Sun, J. Ren and X. Qu, *Biomaterials.* 2017, **113**, 145-157.
- 12 T. Wang, D. Dong, T. Chen, J. Zhu, S. Wang, W. Wen, X. Zhang, H. Tang, J. Liang, S. Wang and H. Xiong, *Chemical Engineering Journal.* 2022, **446**, 137172.
- 13 M. Lu, S. Li, X. Xiong, Z. Huang, B. Xu, Y. Liu, Q. Wu, N. Wu, H. Liu and D. Zhou, *Advanced Functional Materials.* 2022, **32**, 2208061.
- 14 T. Cai, G. Fang, X. Tian, J.J. Yin, C. Chen and C. Ge, *ACS Nano.* 2019, **13**, 12694-12702.
- 15 L. Zhang, L. Zhang, H. Deng, H. Li, W. Tang, L. Guan, Y. Qiu, M.J. Donovan, Z. Chen and W. Tan, *Nat Commun.* 2021, **12**, 2002.
- 16 S. Sharma, N. Chakraborty, D. Jha, H.K. Gautam and I. Roy, *Mater Sci Eng C Mater Biol Appl.* 2020, **113**, 110982.
- 17 F. Gao, T. Shao, Y. Yu, Y. Xiong and L. Yang, *Nat Commun.* 2021, **12**, 745.
